# Supplementary material for: What interventions are required to reduce road traffic injuries in Africa? A scoping review of the literature
Source: PubMed Central journal article supplement (PMC6267971; doi:10.1371/journal.pone.0208195), 2018-11-30
Supplement: pone.0208195.s001.pdf [file pone.0208195.s001.pdf]

|                                      |                                                                                                                                                                                                                                                                                                                                                                                                                                                                                                                                                                                                                                                                                                                                                                                                                                                                                                                                                                                                                                                                                                                                                                                                                                                                                                                                                                                                                                                                                                                                                                                                                                                                                                                                                                                                                                                                                                                                                                          |
|--------------------------------------|--------------------------------------------------------------------------------------------------------------------------------------------------------------------------------------------------------------------------------------------------------------------------------------------------------------------------------------------------------------------------------------------------------------------------------------------------------------------------------------------------------------------------------------------------------------------------------------------------------------------------------------------------------------------------------------------------------------------------------------------------------------------------------------------------------------------------------------------------------------------------------------------------------------------------------------------------------------------------------------------------------------------------------------------------------------------------------------------------------------------------------------------------------------------------------------------------------------------------------------------------------------------------------------------------------------------------------------------------------------------------------------------------------------------------------------------------------------------------------------------------------------------------------------------------------------------------------------------------------------------------------------------------------------------------------------------------------------------------------------------------------------------------------------------------------------------------------------------------------------------------------------------------------------------------------------------------------------------------|
|                                      | republic of[MeSH Terms]) OR mauritania[MeSH Terms]) OR mauritius[MeSH Terms]) OR gabon[MeSH Terms]) OR gabonese republic[MeSH Terms]) OR republic of south africa[MeSH Terms]) OR south africa[MeSH Terms]) OR liberia[MeSH Terms]) OR republic of liberia[MeSH Terms]) OR mozambique[MeSH Terms]) OR republic of mozambique[MeSH Terms]) OR (sao tome and principe[MeSH Terms])) OR mali[Title/Abstract]) OR reunion[MeSH Terms]) OR bostwana[Title/Abstract]) OR republic of rwanda[MeSH Terms]) OR rwanda[MeSH Terms]) OR kingdom of lesotho[MeSH Terms]) OR lesotho[MeSH Terms]) OR niger[MeSH Terms]) AND seychelles[MeSH Terms]) OR republic of namibia[MeSH Terms]) OR namibia[MeSH Terms]) OR federal republic of nigeria[MeSH Terms]) OR nigeria[MeSH Terms]) OR somalia[MeSH Terms]) OR saint helena[MeSH Terms]) OR republic of uganda[MeSH Terms]) OR uganda[MeSH Terms]) OR swaziland[MeSH Terms]) OR republic of senegal[MeSH Terms]) OR senegal[MeSH Terms]) OR tanzania[MeSH Terms]) OR united republic of tanzania[MeSH Terms]) OR republic of sierra leone[MeSH Terms]) OR sierra leone[MeSH Terms]) OR republic of zambia[MeSH Terms]) OR zambia[MeSH Terms]) OR togo[MeSH Terms]) OR togolese republic[MeSH Terms]) OR republic of zimbabwe[MeSH Terms]) OR zimbabwe[MeSH Terms]) OR zimbabwe rhodesia[MeSH Terms])                                                                                                                                                                                                                                                                                                                                                                                                                                                                                                                                                                                                                                  |
| <b>EMBASE</b>                        | (accident traffic OR road traffic injury OR road accident OR road safety) AND (health intervention OR health polic* OR health program* OR health prevention) AND ("africa" OR "west africa" OR "Burundi" OR "republic of Burundi" OR "Angola" OR "Algeria" OR "Benin" OR "republic of Benin" OR "Comoros" OR "iles Comores" OR "Cameroon" OR "republic of Cameroon" OR "united republic of Cameroon" OR "Egypt" OR "arab republic of Egypt" OR "Burkina Faso" OR "burkina faso" OR "Djibouti" OR "republic of Djibouti" OR "Central African Republic" OR "Libya" OR "Cape Verde" OR "republic of cape verde" OR "Eritrea" OR "Chad" OR "Morocco" OR "Cote d'Ivoire" OR "ivory coast" OR "Ethiopia" OR "federal democratic republic of Ethiopia" OR "Congo" OR "congo Brazzaville" OR "congo Kinshasa" OR "Sudan" OR "republic of the sudan" OR "Gambia" OR "republic of the gambia" OR "Kenya" OR "republic of Kenya" OR "Democratic Republic of the Congo" OR "Tunisia" OR "Ghana" OR "republic of Ghana" OR "Madagascar" OR "Guinea" OR "Malawi" OR "republic of Malawi" OR "Equatorial Guinea" OR "republic of equatorial guinea" OR "Guinea-Bissau" OR "republic of guinea Bissau" OR "Mauritius" OR "Gabon" OR "Liberia" OR "republic of Liberia" OR "Mozambique" OR "republic of Mozambique" OR "Sao Tome and Principe" OR "Mali" OR "Reunion" OR "Botswana" OR "Mauritania" OR "Rwanda" OR "republic of Rwanda" OR "Lesotho" OR "kingdom of Lesotho" OR "Niger" OR "republic of niger" OR "Seychelles" OR "Namibia" OR "republic of Namibia" OR "Nigeria" OR "federal republic of Nigeria" OR "Somalia" OR "St Helena" OR "saint Helena" OR "Uganda" OR "republic of Uganda" OR "Swaziland" OR "Senegal" OR "republic of Senegal" OR "United Republic of Tanzania" OR "united republic of Tanzania" OR "Sierra Leone" OR "republic of sierra leone" OR "Zambia" OR "republic of Zambia" OR "Togo" OR "Zimbabwe" OR "republic of Zimbabwe" OR "zimbabwe rhodesia") |
| <b>French Public health database</b> | ([accident circulation] ; [afrique])                                                                                                                                                                                                                                                                                                                                                                                                                                                                                                                                                                                                                                                                                                                                                                                                                                                                                                                                                                                                                                                                                                                                                                                                                                                                                                                                                                                                                                                                                                                                                                                                                                                                                                                                                                                                                                                                                                                                     |
| <b>PsycInfo</b>                      | Road traffic injury AND africa                                                                                                                                                                                                                                                                                                                                                                                                                                                                                                                                                                                                                                                                                                                                                                                                                                                                                                                                                                                                                                                                                                                                                                                                                                                                                                                                                                                                                                                                                                                                                                                                                                                                                                                                                                                                                                                                                                                                           |
| <b>MedNar</b>                        | Road traffic injury africa                                                                                                                                                                                                                                                                                                                                                                                                                                                                                                                                                                                                                                                                                                                                                                                                                                                                                                                                                                                                                                                                                                                                                                                                                                                                                                                                                                                                                                                                                                                                                                                                                                                                                                                                                                                                                                                                                                                                               |
| <b>EBSCOhost</b>                     | (road traffic injury OR road traffic safety OR road traffic accident OR accident tr) AND (health intervention OR health polic* OR health program* OR health prevention) AND (africa OR west africa OR low income OR middle income OR developing countries)<br>Mode de recherche : Boléen/phrase                                                                                                                                                                                                                                                                                                                                                                                                                                                                                                                                                                                                                                                                                                                                                                                                                                                                                                                                                                                                                                                                                                                                                                                                                                                                                                                                                                                                                                                                                                                                                                                                                                                                          |
